# Supplementary material for: Pricing Ancillary Service Subscriptions
Source: Atypon-hosted journal article supplement (doi:10.1287/mnsc.2018.3168), 2019-06-27
Supplement: mnsc.2018.3168.sm1.pdf [file mnsc.2018.3168.sm1.pdf]

## Pricing Ancillary Service Subscriptions

Ruxian Wang, Maqbool Dada, Ozge Sahin

Johns Hopkins Carey Business School, Baltimore, MD 21202

{ruxian.wang, dada, ozge.sahin}@jhu.edu

All technical proofs for the paper titled ‘‘Pricing Ancillary Service Subscriptions’’ are provided in this Online Appendix.

*Proof of Proposition 1.* Under the i.i.d. Gumbel distribution for  $\epsilon_k$ ’s, we have a closed-form expression for  $\pi_k^S$  and  $\pi_k^T$  as follows (see, e.g., Anderson et al. 1992):

$$\begin{aligned}\pi_k^S &= \lambda_k \mu E \left[ \log (u_{k0} + \exp(u_{mk} - p + W_k \cdot u_{ak})) \right] - S \\ &= \lambda_k \mu \cdot (w_k \log(u_{k0} + \exp(u_{mk} - p + u_{ak})) + (1 - w_k) \log(u_{k0} + \exp(u_{mk} - p))) - S, \\ \pi_k^T &= \lambda_k \cdot \mu E \left[ \log (u_{k0} + \exp(u_{mk} - p + W_k \cdot (u_{ak} - T))) \right] \\ &= \lambda_k \mu \cdot (w_k \log(u_{k0} + \exp(u_{mk} - p + u_{ak} - T)) + (1 - w_k) \log(u_{k0} + \exp(u_{mk} - p))).\end{aligned}$$

By the utility equivalence between with and without service subscription, a type- $k$  customer will subscribe to the ancillary service if and only if  $\pi_k^S \geq \pi_k^T$  or equivalently the subscription price  $S$  is less than  $S_k^o(p; w)$ , where  $S_k^o(p; w)$  is defined as follows:

$$S_k^o(p; w) := w_k \cdot \lambda_k \mu \log \left( \frac{\exp(u_{k0}/\mu) + \exp((u_k - p)/\mu)}{\exp(u_{k0}/\mu) + \exp((u_k - p - T)/\mu)} \right) = w_k \cdot S_k^o(p).$$

Note that  $S_k^o(p)$  can be viewed as the willingness to pay for service subscription when customers always consume the main product and ancillary service together.  $\square$

*Proof of Lemma 1.* Let function  $f_1(\alpha)$  be the following

$$f_1(\alpha) := \log \left( \frac{\exp(u_{k0}/\mu) + \exp((u_k - p - (1 - \alpha)T)/\mu)}{\exp(u_{k0}/\mu) + \exp((u_k - p - T)/\mu)} \right) + \frac{(1 - \alpha)T/\mu \cdot \exp((u_k - p - (1 - \alpha)T)/\mu)}{\exp(u_{k0}) + \exp((u_k - p - (1 - \alpha)T)/\mu)}.$$

Consider its first-order derivative as follows:

$$\frac{\partial f_1(\alpha)}{\partial \alpha} = (1 - \alpha)(T/\mu)^2 \cdot \frac{\exp(u_{k0}/\mu) \cdot \exp((u_k - p - (1 - \alpha)T)/\mu)}{(\exp(u_{k0}/\mu) + \exp((u_k - p - (1 - \alpha)T)/\mu))^2} \geq 0.$$

Then,  $f_1(0) \leq f_1(1)$ , i.e.,

$$\frac{T/\mu \cdot \exp((u_k - p - T)/\mu)}{\exp(u_{k0}/\mu) + \exp((u_k - p - T)/\mu)} \leq \log \left( \frac{\exp(u_{k0}/\mu) + \exp((u_k - p)/\mu)}{\exp(u_{k0}/\mu) + \exp((u_k - p - T)/\mu)} \right).$$

Similarly, let function  $f_2(\alpha)$  be the following

$$f_2(\alpha) := \log \left( \frac{\exp(u_{k0}/\mu) + \exp((u_k - p)/\mu)}{\exp(u_{k0}/\mu) + \exp((u_k - p - (1 - \alpha)T)/\mu)} \right) + \frac{\alpha T/\mu \cdot \exp((u_k - p - (1 - \alpha)T)/\mu)}{\exp(u_{k0}) + \exp((u_k - p - (1 - \alpha)T)/\mu)}.$$

Consider its first-order derivative as follows:

$$\frac{\partial f_2(\alpha)}{\partial \alpha} = \alpha(T/\mu)^2 \cdot \frac{\exp(u_{k0}/\mu) \cdot \exp((u_k - p - (1 - \alpha)T)/\mu)}{(\exp(u_{k0}/\mu) + \exp((u_k - p - (1 - \alpha)T)/\mu))^2} \geq 0.$$

Then,  $f_2(0) \leq f_2(1)$ , i.e.,

$$\log \left( \frac{\exp(u_{k0}/\mu) + \exp((u_k - p)/\mu)}{\exp(u_{k0}/\mu) + \exp((u_k - p - T)/\mu)} \right) \leq \frac{T/\mu \cdot \exp((u_k - p)/\mu)}{\exp(u_{k0}/\mu) + \exp((u_k - p)/\mu)}.$$

It completes the proof.  $\square$

*Proof of Proposition 2.* By Lemma 1, Part (a) holds immediately. For part (b), consider the derivative of  $S_k^o(p)$  w.r.t.  $T$ ,

$$\frac{\partial S_k^o(p)}{\partial T} = \frac{\lambda_k \cdot \exp((u_k - p - T)/\mu)}{\exp((u_{k0} - T)/\mu) + \exp((u_k - p - T)/\mu)} \geq 0,$$

and  $\partial S_k^o(p)/\partial T \leq \lambda_k$ . Consider the derivative of  $S_k^o(p)$  w.r.t.  $u_{k0}$  as follows:

$$\frac{\partial}{\partial u_{k0}} \left( \frac{\exp(u_{k0}/\mu) + \exp((u_k - p)/\mu)}{\exp(u_{k0}/\mu) + \exp((u_k - p - T)/\mu)} \right) = - \frac{(\exp((u_k - p)/\mu) - \exp((u_k - p - T)/\mu)) \cdot \exp(u_{k0}/\mu)}{\mu(\exp(u_{k0}/\mu) + \exp((u_k - p - T)/\mu))^2} \leq 0,$$

then  $S_k^o(p)$  is decreasing in the utility of outside option  $u_{k0}$ . Similarly,

$$\frac{\partial}{\partial p} \left( \frac{\exp(u_{k0}/\mu) + \exp((u_k - p)/\mu)}{\exp(u_{k0}/\mu) + \exp((u_k - p - T)/\mu)} \right) = - \frac{\exp(u_{k0}/\mu) \cdot (\exp((u_k - p)/\mu) - \exp((u_k - p - T)/\mu))}{\mu(\exp(u_{k0}/\mu) + \exp((u_k - p - T)/\mu))^2} \leq 0,$$

For the monotonicity of  $S_k^o(p)$  w.r.t.  $\mu$ , consider the derivative as follows:

$$\begin{aligned} \Delta := & \frac{\partial}{\partial \mu} \mu \log \left( \frac{\exp(u_{k0}/\mu) + \exp((u_k - p)/\mu)}{\exp(u_{k0}/\mu) + \exp((u_k - p - T)/\mu)} \right) = \log \left( \frac{\exp(u_{k0}/\mu) + \exp((u_k - p)/\mu)}{\exp(u_{k0}/\mu) + \exp((u_k - p - T)/\mu)} \right) \\ & - \frac{u_{k0} \cdot \exp(u_{k0}/\mu) + (u_k - p) \cdot \exp((u_k - p)/\mu)}{\mu(\exp(u_{k0}/\mu) + \exp((u_k - p)/\mu))} + \frac{u_{k0} \cdot \exp(u_{k0}/\mu) + (u_k - p) \cdot \exp((u_k - p - T)/\mu)}{\mu(\exp(u_{k0}/\mu) + \exp((u_k - p - T)/\mu))}. \end{aligned}$$

The second and third terms together can be rewritten as follows:

$$- \frac{T/\mu \cdot \exp((u_k - p - T)/\mu)}{\exp(u_{k0}/\mu) + \exp((u_k - p - T)/\mu)} + \frac{(u_{k0} - (u_k - p)) \cdot \exp(u_{k0}/\mu) \cdot (\exp((u_k - p)/\mu) - \exp((u_k - p - T)/\mu))}{\mu(\exp((u_{k0} - T)/\mu) + \exp((u_k - p - T)/\mu)) \cdot (\exp(u_{k0}/\mu) + \exp((u_k - p - T)/\mu))}.$$

By Lemma 1, it holds that

$$\log \left( \frac{\exp(u_{k0}/\mu) + \exp((u_k - p)/\mu)}{\exp(u_{k0}/\mu) + \exp((u_k - p - T)/\mu)} \right) \geq \frac{T/\mu \cdot \exp((u_k - p - T)/\mu)}{\exp(u_{k0}/\mu) + \exp((u_k - p - T)/\mu)}.$$

If  $u_k - p \leq u_{k0}$ , then

$$\Delta \geq \frac{(u_{k0} - (u_k - p)) \cdot (1 - \exp(-T/\mu)) \cdot \exp(u_{k0}/\mu) \cdot \exp((u_k - p)/\mu)}{\mu(\exp((u_{k0} - T)/\mu) + \exp((u_k - p - T)/\mu)) \cdot (\exp(u_{k0}/\mu) + \exp((u_k - p - T)/\mu))} \geq 0.$$

Thus,  $S_k^o(p)$  is increasing in  $\mu$  if  $u_k - p \leq u_{k0}$ .

By Lemma 1,

$$\log \left( \frac{\exp(u_{k0}/\mu) + \exp((u_k - p)/\mu)}{\exp(u_{k0}/\mu) + \exp((u_k - p - T)/\mu)} \right) = \log \left( \frac{\exp(u_{k0}/\mu) + \exp((u_k - p)/\mu)}{\exp(u_{k0}/\mu) + \exp((u_k - p - T)/\mu)} \right)$$

$$\leq \frac{T/\mu \cdot \exp((u_k - p)/\mu)}{\exp(u_{k0}/\mu) + \exp((u_k - p)/\mu)}.$$

If  $u_k - p - T \geq u_{k0}$ , then

$$\begin{aligned} \Delta &\leq \frac{T/\mu \cdot \exp((u_k - p)/\mu)}{\exp(u_{k0}/\mu) + \exp((u_k - p)/\mu)} - \frac{T/\mu \cdot \exp((u_k - p - T)/\mu)}{\exp(u_{k0}/\mu) + \exp((u_k - p - T)/\mu)} \\ &\quad + \frac{(u_{k0} - (u - p)) \cdot \exp(u_{k0}/\mu) \cdot (\exp((u_k - p)/\mu) - \exp((u_k - p - T)/\mu))}{\mu(\exp((u_{k0} - T)/\mu) + \exp((u_k - p - T)/\mu)) \cdot (\exp(u_{k0}/\mu) + \exp((u_k - p - T)/\mu))} \\ &= \frac{(u_{k0} - (u_k - p - T)) \cdot \exp(u_{k0}/\mu) \cdot (\exp((u_k - p)/\mu) - \exp((u_k - p - T)/\mu))}{\mu(\exp((u_{k0} - T)/\mu) + \exp((u_k - p - T)/\mu)) \cdot (\exp(u_{k0}/\mu) + \exp((u_k - p - T)/\mu))} \leq 0. \end{aligned}$$

Thus,  $S_k^o(p)$  is decreasing in  $\mu$  if  $u_k - p - T \geq u_{k0}$ .

We consider the limits of  $S_k^o(p)$ .

$$\begin{aligned} \lim_{\mu \rightarrow \infty} S_k^o(p) &= \lambda \cdot \frac{\lim_{\mu \rightarrow \infty} \frac{\partial}{\partial \mu} \cdot \log \left( \frac{\exp(u_{k0}/\mu) + \exp((u_k - p)/\mu)}{\exp(u_{k0}/\mu) + \exp((u_k - p - T)/\mu)} \right)}{\lim_{\mu \rightarrow \infty} -1/\mu^2} \\ &= \lambda \cdot \lim_{\mu \rightarrow \infty} \frac{\exp(u_{k0}/\mu) \cdot u_{k0} + \exp((u_k - p)/\mu) \cdot (u_k - p)}{\exp(u_{k0}/\mu) + \exp((u_k - p)/\mu)} \\ &\quad - \frac{\exp(u_{k0}/\mu) \cdot u_{k0} + \exp((u_k - p - T)/\mu) \cdot (u_k - p - T)}{\exp(u_{k0}/\mu) + \exp((u_k - p - T)/\mu)} \\ &= \lambda \cdot \left( \frac{u_{k0} + u_k - p}{2} - \frac{u_{k0} + u_k - p - T}{2} \right) = \lambda T/2. \end{aligned}$$

If  $u_k - p \leq u_{k0}$ , then

$$\lim_{\mu \rightarrow 0} S^o = \lambda \lim_{\mu \rightarrow 0} \mu \cdot \log \left( \frac{\exp(u_{k0}/\mu) + \exp((u_k - p)/\mu)}{\exp(u_{k0}/\mu) + \exp((u_k - p - T)/\mu)} \right) = \lambda \lim_{\mu \rightarrow 0} \mu \cdot \log \left( \frac{1 + \exp((u_k - p - u_{k0})/\mu)}{1 + \exp((u_k - p - u_{k0} - T)/\mu)} \right) = 0.$$

If  $u_k - p > u_{k0}$ , similarly, we have

$$\begin{aligned} \lim_{\mu \rightarrow 0} S^o &= \lambda \cdot \lim_{\mu \rightarrow \infty} \frac{\exp(u_{k0}/\mu) \cdot u_{k0} + \exp((u_k - p)/\mu) \cdot (u_k - p)}{\exp(u_{k0}/\mu) + \exp((u_k - p)/\mu)} - \frac{\exp(u_{k0}/\mu) \cdot u_{k0} + \exp((u_k - p - T)/\mu) \cdot (u_k - p - T)}{\exp(u_{k0}/\mu) + \exp((u_k - p - T)/\mu)} \\ &= \lambda \cdot \left( u_k - p - \lim_{\mu \rightarrow 0} \frac{\exp(u_{k0}/\mu) \cdot u_{k0} + \exp((u_k - p - T)/\mu) \cdot (u_k - p - T)}{\exp(u_{k0}/\mu) + \exp((u_k - p - T)/\mu)} \right). \end{aligned}$$

If  $u_k - p - T \geq u_{k0}$ , then

$$\lim_{\mu \rightarrow 0} \frac{\exp(u_{k0}/\mu) \cdot u_{k0} + \exp((u_k - p - T)/\mu) \cdot (u_k - p - T)}{\exp(u_{k0}/\mu) + \exp((u_k - p - T)/\mu)} = u_k - p - T;$$

if  $u_k - p - T < u_{k0}$ , then

$$\lim_{\mu \rightarrow 0} \frac{\exp(u_{k0}/\mu) \cdot u_{k0} + \exp((u_k - p - T)/\mu) \cdot (u_k - p - T)}{\exp(u_{k0}/\mu) + \exp((u_k - p - T)/\mu)} = u_{k0}.$$

Therefore, if  $u_k - p - T \geq u_{k0}$ , we have  $\lim_{\mu \rightarrow 0} S_k^o(p) = \lambda_k T$ ; if  $u_k - p - T < u_{k0}$ , we have  $\lim_{\mu \rightarrow 0} S_k^o(p) = \lambda(u_k - p - u_{k0})$ .  $\square$

*Proof of Theorem 1.* We will show that for any pair  $(i, j)$ , the equation on the willingness to pay for type- $i$  and type- $j$  customers, i.e.,  $S_i^o(p) = S_j^o(p)$ , has at most one finite solution w.r.t.  $p$ . Consider the derivative for  $S_i^o(p)$  w.r.t.  $p$  as follows:

$$\frac{\partial S_i^o(p)}{\partial p} = -\gamma_i \cdot \frac{\exp(u_i - p) - \exp(u_i - p - T)}{(1 + \exp(u_i - p)) \cdot (1 + \exp(u_i - p - T))}.$$

Then, after some algebra, the equation  $\partial S_i^o(p)/\partial p = \partial S_j^o(p)/\partial p$  can be rewritten as follows:

$$\begin{aligned} &(\gamma_i \exp(u_j) - \gamma_j \exp(u_i)) \cdot \exp(u_i + u_j - T) \cdot \exp(-2p) + (\gamma_i - \gamma_j) \cdot \exp(u_i + u_j) \\ &\quad \cdot (1 + \exp(-T)) \exp(-p) + (\gamma_i \exp(u_i) - \gamma_j \exp(u_j)) = 0. \end{aligned}$$

The left-hand side (LHS) is a quadratic function in terms of  $\exp(-p)$ , so the above equation has at most two distinct solutions w.r.t.  $p$ , denoted by  $p_1 \leq p_2$ . Therefore,  $S_i^o(p) = S_j^o(p)$  has at most *three* distinct solutions w.r.t.  $p$ . Next, we will show it has at most *one* finite solution.

Without loss of generality, suppose  $\gamma_i \exp(u_j) - \gamma_j \exp(u_i) \geq 0$ . Then,  $S_i^o(p) - S_j^o(p)$  is increasing in  $p$  for  $p \leq p_1$ ; then is decreasing in  $p$  for  $p_1 \leq p \leq p_2$ ; and thereafter is increasing in  $p$  for  $p \geq p_2$ . Consider  $S_i^o(p) = S_j^o(p)$ ,

$$\gamma_i \cdot \log\left(\frac{1 + \exp(u_i - p)}{1 + \exp(u_i - p - T)}\right) = \gamma_j \cdot \log\left(\frac{1 + \exp(u_j - p)}{1 + \exp(u_j - p - T)}\right).$$

Note that  $p = \infty$  is a solution to the above equation. Therefore, there exist at most *two* finite solutions to the equation  $S_i^o(p) = S_j^o(p)$ . Moreover, at  $p = -\infty$ ,  $S_i^o(-\infty) = \gamma_i T$  and  $S_j^o(p) = \gamma_j T$ . We consider two cases: (a)  $\gamma_i \geq \gamma_j$ ; (b)  $\gamma_i < \gamma_j$ .

Case (a):  $\gamma_i \geq \gamma_j$ . Then,  $S_i^o(p) - S_j^o(p) > 0$  for  $p \leq p_1$  because  $S_i^o(p) - S_j^o(p)$  is increasing in  $p$  for  $p \leq p_1$ . Therefore, there exists at most one finite solution to  $S_i^o(p) = S_j^o(p)$  and the solution is between  $p_1$  and  $p_2$ .

Case (b):  $\gamma_i < \gamma_j$ . By  $\gamma_i \exp(u_j) - \gamma_j \exp(u_i) \geq 0$ , we have  $\exp(u_i - u_j) \leq \gamma_i/\gamma_j < 1$ . Then,  $u_i < u_j$ . By part (b) of Proposition 2,  $S_i^o(p)$  and  $S_j^o(p)$  are increasing respectively in  $u_i$  and  $u_j$ , so we have  $S_i^o(p) < S_j^o(p)$  for any  $p$ . In other words, there is no finite solution to  $S_i^o(p) = S_j^o(p)$  in this case.

Thus, we have shown that for any pair  $(i, j)$ , the equation  $S_i^o(p) = S_j^o(p)$  has at most *one* finite solution, or their willingness to pay crosses at most once as the main product price  $p$  changes.  $\square$

*Proof of Proposition 3.* For a given main product price  $p$  and service subscription fee  $S$ , a type- $k$  customer subscribes to the service if and only if her willingness to pay is greater than the subscription fee, i.e.,  $S_k^o(p) \geq S$ . Thus, the total expected revenue for the firm serving heterogeneous customers can be expressed as follows:

$$R(p, S; T) = \sum_{k=1}^K \alpha_k \cdot R_k(p, S; T),$$

where  $R_k(p, S; T)$  is the revenue for each type- $k$  customer. In particular, if  $S \leq S_k^o(p)$ , the type- $k$  customers will subscribe to the ancillary service and

$$R_k(p, S; T) = R_k^S(p, S; T) = \lambda_k p \cdot \frac{\exp(u-p)}{1 + \exp(u-p)} + S;$$

If  $S > S_k^o(p; T)$ , the type- $k$  customers will not subscribe to the ancillary service and

$$R_k(p, S; T) = R_k^T(p; T) = \lambda_k(p+T) \cdot \frac{\exp(u-p-T)}{1 + \exp(u-p-T)}.$$

By Lemma 1, for any given main product price  $p$ , we have

$$\log\left(\frac{1 + \exp(u-p)}{1 + \exp(u-p-T)}\right) \geq \frac{T \cdot \exp(u-p-T)}{1 + \exp(u-p-T)}.$$

Therefore, the firm earns more revenue by providing service subscription. In particular, we show

$R_k^S(p, S_k^o(p); T) \geq R_k^T(p; T)$  in detail as follows:

$$\begin{aligned} R_k^S(p, S_k^o(p); T) - R_k^T(p; T) &= \frac{\lambda_k p \cdot \exp(u-p)}{1 + \exp(u-p)} + \lambda_k \cdot \log\left(\frac{1 + \exp(u-p)}{1 + \exp(u-p-T)}\right) - \frac{\lambda_k(p+T) \cdot \exp(u-p-T)}{1 + \exp(u-p-T)} \\ &\geq \frac{\lambda_k p \cdot \exp(u-p)}{1 + \exp(u-p)} + \frac{\lambda_k T \cdot \exp(u-p-T)}{1 + \exp(u-p-T)} - \frac{\lambda_k(p+T) \cdot \exp(u-p-T)}{1 + \exp(u-p-T)} \\ &= \lambda_k p \cdot (q^S(p) - q^T(p)) \geq 0. \end{aligned}$$

The last inequality holds because  $q^S(p) \geq q^T(p)$ . Moreover,

$$q^S(p) - q^T(p) = \frac{\exp(u-p)}{1 + \exp(u-p)} - \frac{\exp(u-p-T)}{1 + \exp(u-p-T)} \geq \min(q^T(1 - q^T), q^S(1 - q^S)) \cdot T.$$

Then, we have

$$R_k^S(p, S^o(p); T) - R_k^T(p; T) \geq \lambda_k p \cdot \min(q^T(p) \cdot (1 - q^T(p)), q^S(p) \cdot (1 - q^S(p))) \cdot T,$$

which provides a lower bound for the revenue improvement of the main product with subscription of ancillary service, compared to that without subscription.

(a) For the monotonicity of  $R_k^S(p, S_k^o(p); T) - R_k^T(p; T)$ , consider its derivative w.r.t.  $T$  as follows:

$$\frac{\partial[R_k^S(p, S_k^o(p); T) - R_k^T(p; T)]}{\partial T} = \lambda_k(p+T) \cdot \frac{\exp(u-p-T)}{(1 + \exp(u-p-T))^2} > 0.$$

Thus,  $R_k^S(p, S_k^o(p); T) - R_k^T(p; T)$  is strictly increasing in  $T$ .

(b) Similarly, we have the following

$$\frac{\partial[R_k^S(p, S_k^o(p); T) - R_k^T(p; T)]}{\partial p} = -\frac{\lambda_k p \cdot \exp(u-p)}{(1 + \exp(u-p))^2} + \frac{\lambda_k(p+T) \cdot \exp(u-p-T)}{(1 + \exp(u-p-T))^2}.$$

The first-order condition  $\partial(R_k^S(p, S_k^o(p); T) - R_k^T(p; T))/\partial p = 0$  can be rewritten as follows:

$$\frac{p}{p+T} \cdot \left(\frac{1 + \exp(u-p-T)}{1 + \exp(u-p)}\right)^2 = \exp(-T).$$

Because  $p/(p+T) = 1 - T/(p+T)$  is increasing in  $p$  and  $(1 + \exp(u - p - T))/(1 + \exp(u - p)) = 1 - (\exp(u) - \exp(u - T))/(\exp(p) + \exp(u))$  is also increasing in  $p$ , then the above equation has at most one solution w.r.t.  $p$ , denoted by  $p^o$ . Then, for any  $p \leq p^o$ , we have  $\partial(R_k^S(p, S_k^o(p); T) - R_k^T(p; T))/\partial p \geq 0$ ; for any  $p \geq p^o$ , we have  $\partial(R_k^S(p, S_k^o(p); T) - R_k^T(p; T))/\partial p \leq 0$ . Therefore,  $R_k^S(p, S_k^o(p); T) - R_k^T(p; T)$  is strictly increasing in the main product price  $p$  if  $p \leq p^o$ ; and is strictly decreasing in  $p$  for  $p \geq p^o$ .  $\square$

*Proof of Theorem 2.* Consider the derivative of  $R(p, S_k^o(p); T)$  defined in equation (10) w.r.t.  $T$  as follows:

$$\frac{\partial R(p, S_k^o(p); T)}{\partial T} = \sum_{i=1}^K \alpha_i \lambda_i (q^T(p))^2 - \sum_{i=k}^K \alpha_i (\lambda_i q^T(p) - \lambda_k) \cdot q^T(p),$$

where  $q^T(p)$  is defined in equation (2), i.e.,  $q^T(p) = \exp(u - p - T)/(1 + \exp(u - p - T))$ . Notice that  $\lambda_k$  is increasing in  $k$ , i.e.,  $\lambda_1 < \lambda_2 < \dots < \lambda_K$ . Therefore, for any given main product price  $p$  and the pay-per-use service cost  $T$ , the derivative  $\partial R(p, S_k^o(p); T)/\partial T$  is increasing in  $k$ , i.e.,

$$\frac{\partial R(p, S_1^o(p); T)}{\partial T} < \frac{\partial R(p, S_2^o(p); T)}{\partial T} < \dots < \frac{\partial R(p, S_K^o(p); T)}{\partial T}.$$

Thus, for any pair  $(k, k')$ , lines  $R(p, S_k^o(p); T)$  and  $R(p, S_{k'}^o(p); T)$  cross at most once or there exists at most one solution to equation  $R(p, S_k^o(p); T) = R(p, S_{k'}^o(p); T)$  w.r.t.  $T$ , denoted by  $x_{k, k'}$ .

Next, we show that among all the intersections  $x_{k, k'}$ 's, there exist at most  $K - 1$  points, denoted by  $\infty = T_{\tau(0)} > T_{\tau(1)} > \dots > T_{\tau(K^o-1)} > T_{\tau(K^o)} = 0$ ,  $K^o \leq K$  such that for any  $T_{\tau(k)} \leq T < T_{\tau(k-1)}$ , we have  $R(p, S_{\tau(k)}^o(p); T) \geq R(p, S_{k'}^o(p); T)$  for any  $k' \neq \tau(k)$ .

By the definition of  $S_k^o(p; T)$  (we indicate the dependence of  $T$  explicitly to show the threshold results) in equation (4), we have  $S_k^o(p; \infty) = \lim_{T \rightarrow \infty} S_k^o(p; T) = \lambda_k \log(1 + \exp(u - p))$ . Then, all type- $i$  customers will subscribe to the service,  $i \geq k$ ; all other customers will neither subscribe to service nor purchase main product with pay-per-use option, so the total revenue can be rewritten as follows:

$$R(p, S_k^o(p; \infty); \infty) = \sum_{i=k}^K \alpha_i \left( S_k^o(p; \infty) + \lambda_i p \cdot \frac{\exp(u - p)}{1 + \exp(u - p)} \right).$$

Let  $\tau(1)$  be the index of the highest  $R(p, S_k^o(p; \infty); \infty)$ , defined as follows:

$$\tau(1) = \arg \max \left\{ R(p, S_i^o(p; \infty); \infty) : i = 1, 2, \dots, K \right\}.$$

Suppose that the largest point among  $x_{\tau(1), k}$  for any  $k \neq \tau(1)$  is  $x_{\tau(1), \tau(2)}$ , which is the solution to  $R(p, S_{\tau(1)}^o(p); T) = R(p, S_{\tau(2)}^o(p); T)$ . Let  $T_{\tau(1)} = x_{\tau(1), \tau(2)}$ . Note that  $R(p, S_{\tau(1)}^o(p); T) \geq R(p, S_k^o(p); T)$  for  $k \neq \tau(1)$  and any  $T \geq T_{\tau(1)}$ ;  $R(p, S_{\tau(2)}^o(p); T) \geq R(p, S_{\tau(1)}^o(p); T)$  for any  $T < T_{\tau(1)}$ . Moreover,  $\partial R(p, S_{\tau(2)}^o(p); T)/\partial T < \partial R(p, S_{\tau(1)}^o(p); T)/\partial T$  for any given  $p$  and  $T$  and therefore  $\tau(1) > \tau(2)$  because  $\partial R(p, S_k^o(p); T)/\partial T$  is increasing in  $k$  for any given  $p$  and  $T$ . Therefore, for any  $T \geq T_{\tau(1)}$ , it

is optimal to charge  $S_{\tau(1)}^o(p; T)$  for the service subscription and all type- $k$  customers will subscribe to the service,  $k \geq \tau(1)$ .

Now, remove  $\tau(1)$  from the consideration set. Denote the largest point among  $x_{\tau(2),k}$  for any  $k \neq \tau(1), \tau(2)$  by  $x_{\tau(2),\tau(3)}$ . Let  $T_{\tau(2)} = x_{\tau(2),\tau(3)}$ . By similar arguments, we have  $R(p, S_{\tau(2)}^o(p); T) \geq R(p, S_k^o(p); T)$  for  $k \neq \tau(2)$  and any  $T_{\tau(1)} > T \geq T_{\tau(2)}$ ;  $R(p, S_{\tau(3)}^o(p); T) \geq R(p, S_{\tau(2)}^o(p); T) \geq R(p, S_{\tau(1)}^o(p); T)$  for any  $T < T_{\tau(2)}$ . Moreover,  $\tau(2) > \tau(3)$ . Therefore, for any  $T_{\tau(1)} > T \geq T_{\tau(2)}$ , it is optimal to charge  $S_{\tau(2)}^o(p; T)$  for the service subscription and all type- $k$  customers will subscribe to the service,  $k \geq \tau(2)$ .

Repeat the above procedure and stop until only one is left, denoted by  $R(p, S_{\tau(K^o)}^o(p); T)$ . Let  $T_{\tau(K^o)} = 0$ . Thus, we have show that for any  $T_{\tau(k)} \leq T < T_{\tau(k-1)}$ , it is optimal to charge  $S_{\tau(k)}^o(p; T)$  for the service subscription and all type- $i$  customers will subscribe to it,  $i \geq \tau(k)$ .

We remark that  $K^o$  may be strictly smaller than  $K$ , i.e., it may not be optimal to charge the willingness to pay of a certain type of customers as  $T$  changes. It is the case if that type of customers do not contribute a significant amount of market share.  $\square$

*Proof of Theorem 3.* (a) Solving equation  $S_k^o(p) = S$  yields  $p_k$ , i.e.,

$$\lambda_k \cdot \log \left( \frac{1 + \exp(u - p)}{1 + \exp(u - p - T)} \right) = S \implies p_k = u - \log \left( \frac{\exp(S/\lambda_k) - 1}{1 - \exp(S/\lambda_k - T)} \right).$$

If  $\lambda_k \leq S/T$ , the type- $k$  customer will not subscribe to the service, we set  $p_k = 0$ . Notice that  $\lambda_k$  is assumed to be increasing in  $k$ , so  $p_k$  is also increasing in  $k$ , i.e.,  $p_1 \leq p_2 \leq \dots \leq p_K$ . For any product price  $p_k < p \leq p_{k+1}$ , we have  $S_k^o(p) < S$  and  $S_{k+1}^o(p) \geq S$ . Therefore, all type- $j$  customers,  $j \leq k$ , will *not* subscribe to the service, whereas all type- $j$  customers,  $j \geq k + 1$ , will subscribe to the service.

(b) We compare the values of  $R(p, S; T)$  at the left and right sides of point  $p_k$ :

$$\begin{aligned} \lim_{p \nearrow p_k} R(p, S; T) &= \sum_{i=1}^{k-1} \alpha_i \lambda_i (p + T) \cdot \frac{\exp(u - p - T)}{1 + \exp(u - p - T)} + \sum_{i=k}^K \alpha_i \left( S_k^o(p) + \lambda_i p \cdot \frac{\exp(u - p)}{1 + \exp(u - p)} \right), \\ \lim_{p \searrow p_k} R(p, S; T) &= \sum_{i=1}^k \alpha_i \lambda_i (p + T) \cdot \frac{\exp(u - p - T)}{1 + \exp(u - p - T)} + \sum_{i=k+1}^K \alpha_i \left( S_k^o(p) + \lambda_i p \cdot \frac{\exp(u - p)}{1 + \exp(u - p)} \right). \end{aligned}$$

Note that  $S_k^o(p) = \lambda_k \cdot \log \left( \frac{1 + \exp(u - p_k)}{1 + \exp(u - p_k - T)} \right)$ , and therefore, the comparison between  $\lim_{p \nearrow p_k} R(p, S; T)$  and  $\lim_{p \searrow p_k} R(p, S; T)$  becomes the comparison between  $R_k(p_k, S_k^o(p); T)$  and  $R_k^T(p; T)$ , which are defined in equations (6) and (7). By Proposition 3, we have  $R_k(p_k, S_k^o(p); T) > R_k^T(p; T)$ , and therefore  $\lim_{p \nearrow p_k} R(p, S; T) > \lim_{p \searrow p_k} R(p, S; T)$ .

(c) Note that the unique solution to  $p + T = 1 + \exp(u - p - T)$  w.r.t.  $p$  is  $p_T^*$ . Suppose  $p_{j^o} \leq p_T^* < p_{j^o+1} \leq p_{k^o} \leq p_T^* + T < p_{k^o+1}$ . For any product price  $p_k < p \leq p_{k+1}$ , the total revenue can be expressed as follows:

$$R(p, S; T) = \sum_{i=1}^k \alpha_i \lambda_i (p + T) \cdot \frac{\exp(u - p - T)}{1 + \exp(u - p - T)} + \sum_{i=k+1}^K \alpha_i \left( S + \lambda_i p \cdot \frac{\exp(u - p)}{1 + \exp(u - p)} \right).$$

Consider its derivative w.r.t.  $p$  as follows:

$$\begin{aligned} \frac{\partial R(p, S; T)}{\partial p} &= q^T \left( \sum_{i=1}^k \alpha_i \lambda_i \left( 1 - \frac{p+T}{1 + \exp(u-p-T)} \right) + \sum_{i=k+1}^K \alpha_i \lambda_i \left( 1 - \frac{p}{1 + \exp(u-p)} \right) \right. \\ &\quad \left. \cdot \left( 1 + \frac{\exp(T) - 1}{1 + \exp(u-p)} \right) \right). \end{aligned}$$

For any  $p \leq p_T^*$ , we have  $\frac{p}{1 + \exp(u-p)} < \frac{p+T}{1 + \exp(u-p-T)} \leq 1$ , and therefor  $\partial R(p, S; T)/\partial p > 0$ . Note that  $\lim_{p \nearrow p_k} R(p, S; T) < \lim_{p \searrow p_k} R(p, S; T)$ . Thus, given service subscription fee  $S$ ,  $R(p, S; T)$  is increasing in  $p$  for  $p \leq p_T^*$ .

Similarly, for any  $p \geq p_T^* + T$ , we have  $\frac{p+T}{1 + \exp(u-p-T)} > \frac{p}{1 + \exp(u-p)} \leq 1$ , and therefor  $\partial R(p, S; T)/\partial p < 0$ , so  $R(p, S; T)$  is decreasing in  $p$  for  $\max(p_k, p_T^* + T) \leq p < p_{k+1}$ .  $\square$

*Proof of Proposition 4.* Customers subscribe to the service if and only if  $S^o(p) \geq S$ , i.e.,

$$\lambda_k \cdot \log \left( \frac{1 + \exp(u-p)}{1 + \exp(u-p-T)} \right) \geq S \implies p_k \leq u - \log \left( \frac{\exp(S/\lambda_k) - 1}{1 - \exp(S/\lambda_k - T)} \right).$$

The revenue comparison yields

$$S + \lambda_k p \cdot \frac{\exp(u-p)}{1 + \exp(u-p)} \geq \max_p \lambda_k (p+T) \cdot \frac{\exp(u-p-T)}{1 + \exp(u-p-T)} := R_T^*.$$

Note that  $R_k^S(p, S_k^o(p); T) = \lambda_k \cdot \log \left( \frac{1 + \exp(u-p)}{1 + \exp(u-p-T)} \right) + \lambda_k p \cdot \frac{\exp(u-p)}{1 + \exp(u-p)}$ . We consider its derivative as follows:

$$\frac{\partial R_k^S(p, S_k^o(p); T)}{\partial p} = \lambda_k q^S(p) \cdot (q^T(p)/q^S(p) - p(1 - q^S(p))).$$

The ratio  $q^T(p)/q^S(p)$  is decreasing in  $p$  because

$$\frac{\partial q^T(p)/q^S(p)}{\partial p} = \exp(-T) \cdot \frac{\partial}{\partial p} \frac{1 + \exp(u-p)}{1 + \exp(u-p-T)} = -\frac{(1 - \exp(-T)) \cdot \exp(u-p-T)}{(1 + \exp(u-p-T))^2} \leq 0.$$

Notice that  $p(1 - q^S(p))$  is increasing in  $p$ . Thus,  $q^T(p)/q^S(p) - p(1 - q^S(p))$  is decreasing in  $p$  from positive to negative as  $p$  increases from zero to infinity, and therefore  $R^S(p, S^o(p); T)$  is strictly unimodal in  $p$ . Moreover,  $\max_p R_k^S(p, S^o(p); T) \geq R_T^*$ . Then, equation  $R_k^S(p, S^o(p); T) = R_T^*$  has two distinct solutions, denoted by  $\underline{p} \leq \bar{p}$ . Let  $\underline{S} = S_k^o(\bar{p})$  and  $\bar{S} = S_k^o(\underline{p})$ . For any  $\underline{S} \leq S \leq \bar{S}$ , we have

$$\max_{p: S_k^o(p) \geq S} S + \lambda_k p \cdot \frac{\exp(u-p)}{1 + \exp(u-p)} \leq \max_{p: S_k^o(p) \geq S} S^o(p) + \lambda_k p \cdot \frac{\exp(u-p)}{1 + \exp(u-p)} \leq \max_p R_k^S(p, S^o(p); T).$$

Let  $S_k^o(p') = S$ . Then, we have  $\underline{p} \leq p' \leq \bar{p}$  and

$$\max_{p: S_k^o(p) \geq S} S + \lambda_k p \cdot \frac{\exp(u-p)}{1 + \exp(u-p)} \geq R_k^S(p', S^o(p'); T) > R_T^*.$$

The last inequality holds because  $R^S(p, S_k^o(p); T)$  is strictly unimodal in  $p$ , and  $R_k^S(\underline{p}, S_k^o(\underline{p}); T) = R_k^S(\bar{p}, S_k^o(\bar{p}); T) = R_T^*$ .

For any  $S < \underline{S}$  (resp.,  $S > \bar{S}$ ), we have the following

$$\max_{p: S_k^o(p) \geq S} S + \lambda_k p \cdot \frac{\exp(u-p)}{1 + \exp(u-p)} \leq \max_{p: S_k^o(p) \geq S} S_k^o(p) + \lambda_k p \cdot \frac{\exp(u-p)}{1 + \exp(u-p)} = \max_{p: S_k^o(p) \geq S} R_k^S(p, S_k^o(p); T) < R_T^*.$$

The last inequality holds because  $R_k^S(p, S_k^o(p); T)$  is strictly unimodal in  $p$ ,  $R_k^S(\underline{p}, S_k^o(\underline{p}); T) = R_k^S(\bar{p}, S_k^o(\bar{p}); T) = R_T^*$ , and  $p > \bar{p}$  (resp.,  $p < \underline{p}$ ).  $\square$

*Proof of Theorem 4.* By equation (10), if the service subscription charges  $S_k^o(p)$ , all type- $i$  customers will not subscribe to ancillary service and use the pay-per-use option,  $i < k$ , and their revenue can be expressed as follows:

$$\sum_{i=1}^{k-1} \alpha_i \lambda_i (p+T) \cdot \frac{\exp(u-p-T)}{1 + \exp(u-p-T)}.$$

Considering the first-order condition for the above equation yields

$$1 - (p+T)/(1 + \exp(u-p-T)) = 0.$$

Thus, the total revenue is strictly unimodal in  $p$  and the optimal product price is equal to the unique solution to the first-order condition, denoted by  $p_T^*$ . All other type- $i$  customers will subscribe to the ancillary service,  $i \geq k$ , and their revenue can be expressed as follows:

$$\sum_{i=k}^K \alpha_i \left( S_k^o(p; T) + \lambda_i p \cdot \frac{\exp(u-p)}{1 + \exp(u-p)} \right).$$

Considering the first-order condition for the above equation yields

$$1 - \frac{p}{1 + \exp(u-p)} - \frac{\lambda_k \sum_{i=k}^K \alpha_i}{\sum_{i=k}^K \lambda_i \alpha_i} \cdot \frac{1 - \exp(-T)}{1 + \exp(u-p-T)} = 0.$$

The LHS is decreasing in  $p$ , so the objective function is strictly unimodal and has the unique maximizer, denoted by  $p_k^S$ .

Let  $\bar{\lambda}_k$  be the weighted average demand rate, i.e.,  $\bar{\lambda}_k = \sum_{i=k}^K \lambda_i \alpha_i / \sum_{i=k}^K \alpha_i$ . Notice that  $\lambda_k$  is increasing in  $k$ , so it is straightforward to show that  $\bar{\lambda}_k$  is increasing in  $k$ . Moreover, if  $\lambda_k / \bar{\lambda}_k \geq \lambda_{k+1} / \bar{\lambda}_{k+1}$  (resp.,  $\lambda_k / \bar{\lambda}_k \leq \lambda_{k+1} / \bar{\lambda}_{k+1}$ ), then we have  $p_k^S \geq p_{k+1}^S$  (resp.,  $p_k^S \leq p_{k+1}^S$ ).  $\square$

*Proof of Theorem 5.* To show that charging  $S_L^o$  earns more revenue than charging  $S_H^o$  for service subscription, we need to show the following inequality

$$(\alpha_L \lambda_L \cdot q_L^S(p) + \alpha_H \lambda_H \cdot q_H^S(p)) \cdot p + S_L^o(p) \geq \alpha_L \lambda_L (p+T) \cdot q_L^T(p) + \alpha_H (\lambda_H p \cdot q_H^S(p) + S_H^o(p)) \quad (\text{EC.1})$$

The above inequality holds if  $\alpha_L > \underline{\alpha}_L$  or  $\lambda_L > \underline{\lambda}_L$ , where  $\underline{\alpha}_L$  and  $\underline{\lambda}_L$  are defined as follows:

$$\underline{\alpha}_L = \frac{S_H^o(p) - S_L^o(p)}{\alpha_L (q_L^S(p) \cdot p - q_L^T(p) \cdot (p+T)) + S_H^o(p)} \quad \text{and} \quad \underline{\lambda}_L = \frac{(1 - \alpha_L) S_H^o(p) - S_L^o(p)}{\alpha_L (q_L^S(p) \cdot p - q_L^T(p) \cdot (p+T))}.$$

Similarly, the equation  $R(p, S_H^o(p)) = R(p, S_L^o(p))$  can be rewritten as follows:

$$\frac{\alpha_L \lambda_L \cdot (q_L^S(p) \cdot p - q_L^T(p) \cdot (p+T)) + S_L^o(p)}{(1 - \alpha_L) \cdot \lambda_H} = \log \left( \frac{1 + \exp(u_H - p)}{1 + \exp(u_H - p - T)} \right).$$

By Proposition 2, the RHS is strictly increasing in  $u_H$ , so denote the unique solution w.r.t.  $u_H$  by  $\bar{u}_H$ . Then, for any  $u_H < \bar{u}_H$ , we have  $R(p, S_H^o(p)) < R(p, S_L^o(p))$ .

The inequality (EC.1) can be rewritten as follows  $\alpha_L \cdot (\lambda_L p \cdot q_S(p) + S_H^o(p) - \lambda_L(p+T) \cdot q_T(p)) \geq S_H^o(p) - S_L^o(p)$ . Define  $\underline{\alpha}_L$  as follows:

$$\underline{\alpha}_L = \frac{S_H^o(p) - S_L^o(p)}{\lambda_L p \cdot q_S(p) + S_H^o(p) - \lambda_L(p+T) \cdot q_T(p)}.$$

Noting that  $\lambda_L p \cdot q_S(p) + S_H^o(p) - \lambda_L(p+T) \cdot q_T(p) > \lambda_L p \cdot q_S(p) + S_L^o(p) - \lambda_L(p+T) \cdot q_T(p) > 0$ , then,  $\underline{\alpha}_L > 0$  and if and only if  $\alpha_L \geq \underline{\alpha}_L$ , the desired inequality (EC.1) holds.

The inequality (EC.1) can also be rewritten as follows:

$$\lambda_L \left( \alpha_L (p \cdot q_S(p) - (p+T) \cdot q_T(p)) + \log \left( \frac{1 + \exp(u-p)}{1 + \exp(u-p-T)} \right) \right) \geq \alpha_H \lambda_H \log \left( \frac{1 + \exp(u-p)}{1 + \exp(u-p-T)} \right).$$

Let  $\underline{\lambda}_L$  be defined as follows:

$$\underline{\lambda}_L = \frac{\alpha_H \lambda_H \log \left( \frac{1 + \exp(u-p)}{1 + \exp(u-p-T)} \right)}{\alpha_L (p \cdot q_S(p) - (p+T) \cdot q_T(p)) + \log \left( \frac{1 + \exp(u-p)}{1 + \exp(u-p-T)} \right)}.$$

By similar arguments, we know  $\underline{\lambda}_L > 0$ . Therefore, if and only if  $\lambda_L \geq \underline{\lambda}_L$ , the desired inequality (EC.1) holds.  $\square$

*Proof of Corollary 2.* Consider the first-order derivative of  $R^S(p, S^o(p))$  as follows:

$$\frac{\partial R^S(p, S^o(p))}{\partial p} = \lambda q^S(p) \cdot (q^T(p)/q^S(p) - p(1 - q^S(p))).$$

The ratio  $q^T(p)/q^S(p)$  is decreasing in  $p$  because

$$\frac{\partial q^T(p)/q^S(p)}{\partial p} = \exp(-T) \cdot \frac{\partial}{\partial p} \frac{1 + \exp(u-p)}{1 + \exp(u-p-T)} = -\frac{(1 - \exp(-T)) \cdot \exp(u-p-T)}{(1 + \exp(u-p-T))^2} \leq 0.$$

Notice that  $p(1 - q^S(p))$  is increasing in  $p$ . Therefore,  $q^T(p)/q^S(p) - p(1 - q^S(p))$  is decreasing in  $p$  from positive to negative as  $p$  increases from zero to infinity, and  $R^S(p, S^o(p))$  is strictly unimodal in  $p$ . Solving the following first-order condition yields the unique optimal price  $p_S^*$  for the main product in the presence of service subscription, i.e.,  $q^T(p)/q^S(p) - p(1 - q^S(p)) = 0$ .

Without service subscription, we maximize the total revenue  $R^T(p)$  w.r.t.  $p$ . Given the pay-per-use price  $T$  of the ancillary service, the optimal price of the main product  $p_T^*$  can be found by solving the corresponding first-order condition

$$1 - (p+T)(1 - q_T(p)) \Big|_{p=p_T^*} = 1 - \frac{(p_T^* + T)}{1 + \exp((u - p_T^* - T)/\mu)} = 0.$$

Note that  $q^T(p)|_{p=p_T^*} = q^S(p)|_{p=p_T^*+T}$  and  $q^T \leq q^S$  for any price  $p$  and  $T \geq 0$ . Therefore,

$$q^T(p)/q^S(p) - p(1 - q^S(p)) \Big|_{p=p_T^*+T} \leq 0.$$

Thus, the optimal price of the main product in the presence of service subscription is lower than  $p_T^* + T$ , i.e.,  $p_S^* \leq p_T^* + T$ . For the other side of the inequalities, consider the following

$$\begin{aligned} q^T(p)/q^S(p) - p(1 - q^S(p)) \Big|_{p=p_T^*} &= \frac{\exp(-T) + \exp(u - p_T^* - T)}{1 + \exp(u - p_T^* - T)} - \frac{p_T^*}{1 + \exp(u - p_T^*)} \\ &= 1 - \frac{1 - \exp(-T)}{1 + \exp(u - p_T^* - T)} - \frac{p_T^*}{1 + \exp(u - p_T^*)} = \frac{p_T^*}{1 + \exp(u - p_T^* - T)} - \frac{p_T^*}{1 + \exp(u - p_T^*)} \\ &\quad + \frac{T - (1 - \exp(-T))}{1 + \exp(u - p_T^* - T)} \geq 0. \end{aligned}$$

The third equality holds because  $1 - (p_T^* + T)/(1 + \exp(u - p_T^* - T)) = 0$ ; the inequality holds because  $x \geq 1 - \exp(-x)$  for any  $x \geq 0$ . Recall that  $q^T(p)/q^S(p) - p(1 - q^S(p))$  is decreasing in  $p$ , then therefore we have  $p_S^* \geq p_T^*$ .

Consider the cross derivative of  $R^S(p, S^o(p))$  w.r.t.  $p$  and  $T$  as follows:

$$\frac{\partial^2 R^S(p, S^o(p))}{\partial p \partial T} = \lambda \partial q^T(p) / \partial T = -\lambda / \mu \cdot q^T(p)(1 - q^T(p)) \leq 0.$$

Then,  $R^S(p, S^o(p))$  has decreasing differences in  $(p, T)$ , and therefore  $p_S^*$  is decreasing in  $T$  (see, e.g., Theorem 2.3 in Vives 2001).  $\square$

*Proof of Corollary 3.* Suppose  $u_H = u_L = u$ , then  $q_k^S(p)$  and  $q_k^T(p)$  are invariant in  $k$ , so we omit the subscript  $k$ . By Proposition 2,  $S_H^o(p) \leq \lambda_H T \cdot q_S(p)$  and  $S_L^o(p) \geq \lambda_L T \cdot q_T(p)$ . The inequality (EC.1) holds in a stronger version as follows:

$$\alpha_L \lambda_L (p q^S(p) - (p + T) q^T(p)) + \alpha_L S_L^o(p) \geq \alpha_L \lambda_L p (q^S(p) - q^T(p)) \geq \alpha_H (\lambda_H - \lambda_L) T \cdot q^S(p),$$

which is equivalent to

$$p(1 - q^T(p)/q^S(p)) \geq \frac{\alpha_H (\lambda_H - \lambda_L) T}{\alpha_L \lambda_L}.$$

By the proof of Corollary 2,  $(1 - q^T(p)/q^S(p))$  is increasing in  $p$ . Note that  $p(1 - q^T(p)/q^S(p)) \rightarrow \infty$  as  $p \rightarrow \infty$ . Let  $\underline{p}$  be the unique solution to

$$p(1 - q^T(p)/q^S(p)) = \frac{\alpha_H (\lambda_H - \lambda_L) T}{\alpha_L \lambda_L}.$$

Then, if  $p \geq \underline{p}$ , the desired inequality (EC.1) holds.

(b) Consider the first-order derivative of  $R(p, S_L^o(p))$  as follows:

$$\frac{\partial R(p, S_L^o(p))}{\partial p} = (\alpha_L \lambda_L + \alpha_H \lambda_H) q^S(p) \cdot \left( \frac{\alpha_H (\lambda_H - \lambda_L)}{\alpha_L \lambda_L + \alpha_H \lambda_H} + q^T(p)/q^S(p) - p(1 - q^S(p)) \right).$$

We can show that  $q^T(p)/q^S(p) - p(1 - q^S(p))$  is decreasing in  $p$  from positive to negative as  $p$  increases from zero to infinity, and  $R^S(p, S^o(p))$  is strictly unimodal in  $p$ . Solving the following first-order condition yields the unique optimal price  $p_L^*$  for the main product in the presence of service subscription, i.e.,

$$\frac{\alpha_H(\lambda_H - \lambda_L)}{\alpha_L\lambda_L + \alpha_H\lambda_H} + q^T(p)/q^S(p) - p(1 - q^S(p)) = 0.$$

For the case of charging  $S_H^o(p)$  for the service subscription,  $R(p, S_H^o(p)) = \alpha_L\lambda_L(p + T) \cdot q^T(p) + \alpha_H(\lambda_H p \cdot q^S(p) + S_H^o(p))$ . Moreover,  $(p + T) \cdot q^T(p)$  is unimodal in  $p$  and it achieves its maximum at  $p_T^*$ ;  $\lambda_H p \cdot q^S(p) + S_H^o(p)$  is also unimodal in  $p$  and it achieves its maximum at  $p_S^*$  by solving the corresponding first-order condition

$$q^T(p)/q^S(p) - p(1 - q^S(p)) = 0.$$

Moreover, we have  $p_T^* < p_S^*$ . Because  $R(p, S_H^o(p))$  is the sum of two unimodal functions, which may not be unimodal, it must achieve its maximum at a point between  $p_T^*$  and  $p_S^*$ , i.e.,  $p_T^* < p_H^* < p_S^*$ .

Furthermore, by comparing the above two first-order conditions and noting  $\lambda_H \geq \lambda_L$ , we have  $p_L^* \geq p_S^*$ . Therefore,  $p_H^* < p_L^*$ .  $\square$

*Proof of Theorem 6.* We first show that there exists a unique equilibrium, under which each firm  $i$  offers subscription at price  $S_i^*(p_i, p_j)$  and all customers will subscribe to the ancillary service with both firms.

Suppose that each firm  $i$  offers subscription at price  $S_i$ . A customer faces four options when deciding whether to subscribe to the ancillary service with each firm: (1) subscribe neither; (2) subscribe to firm  $i$  only; (3) subscribe to firm  $j$  only; (4) subscribe to both firms  $i$  and  $j$ . We will investigate all the cases one by one.

Case (1): customers subscribe to neither ancillary service. The revenue of firm  $i$  is

$$R_i = \lambda(p_i + T) \cdot \frac{\exp(u_i - p_i - T)}{1 + \exp(u_i - p_i - T) + \exp(u_j - p_j - T)}.$$

By Proposition 3, firm  $i$ 's revenue will be higher if offering subscription of ancillary service at price

$$S_i = \lambda \log \left( \frac{1 + \exp(u_i - p_i) + \exp(u_j - p_j - T)}{1 + \exp(u_i - p_i - T) + \exp(u_j - p_j - T)} \right).$$

Therefore, case (1) is not an equilibrium.

Cases (2) and (3): customers subscribe to ancillary service with either of the two firms only, e.g., firm  $i$ . By similar arguments, firm  $j$ 's revenue will be higher if it also offers subscription at an appropriate price as follows:

$$S_j = \lambda \log \left( \frac{1 + \exp(u_i - p_i) + \exp(u_j - p_j)}{1 + \exp(u_i - p_i) + \exp(u_j - p_j - T)} \right).$$

Therefore, neither cases (2) nor (3) is a Nash equilibrium.

Case (4): customers subscribe to ancillary service with both providers. Apparently,  $(S_i^*(p_i, p_j), S_j^*(p_i, p_j))$  is an equilibrium by now familiar arguments. Then, we argue that any pair of subscription fees  $(S_i, S_j)$  other than  $(S_i^*(p_i, p_j), S_j^*(p_i, p_j))$  is not an equilibrium. Note that customers subscribe to ancillary service with both firms, so by similar argument to equation (2) the following inequalities hold:

$$S_i \leq S_i^*(p_i, p_j) \text{ and } S_j \leq S_j^*(p_i, p_j).$$

If one of the above inequalities holds strictly, e.g.,  $S_i < S_i^*(p_i, p_j)$ , firm  $i$  can earn strictly more revenue by increasing the subscription fee to  $S_i^*(p_i, p_j)$  because all customers still subscribe to its service and the main product price is fixed. Therefore,  $(S_i^*(p_i, p_j), S_j^*(p_i, p_j))$  is the unique equilibrium.

At the equilibrium, the customer's surplus is equal to the expected maximum utility subtracted by the upfront subscription fees, i.e.,  $\lambda \log(1 + \exp(u_i - p_i) + \exp(u_j - p_j)) - S_i^*(p_i, p_j) - S_j^*(p_i, p_j)$ . To show that customers are better-off at the equilibrium, we compare customer surplus without and with subscription as follows:

$$\begin{aligned} & \lambda \log(1 + \exp(u_i - p_i) + \exp(u_j - p_j)) - S_i^*(p_i, p_j) - S_j^*(p_i, p_j) - \lambda \log(1 + \exp(u_i - p_i - T) \\ & \quad + \exp(u_j - p_j - T)) \\ &= \lambda \log \left( \frac{(1 + \exp(u_i - p_i - T) + \exp(u_j - p_j)) \cdot (1 + \exp(u_i - p_i) + \exp(u_j - p_j - T))}{(1 + \exp(u_i - p_i) + \exp(u_j - p_j)) \cdot (1 + \exp(u_i - p_i - T) + \exp(u_j - p_j - T))} \right) > 0. \end{aligned}$$

The inequality holds because

$$\begin{aligned} & (1 + \exp(u_i - p_i - T) + \exp(u_j - p_j)) \cdot (1 + \exp(u_i - p_i) + \exp(u_j - p_j - T)) \\ & \quad - (1 + \exp(u_i - p_i) + \exp(u_j - p_j)) \cdot (1 + \exp(u_i - p_i - T) + \exp(u_j - p_j - T)) \\ &= \exp(u_i - p_i - T) \cdot \exp(u_j - p_j - T) \cdot (\exp(T) - 1)^2 > 0. \end{aligned}$$

The inequality holds strictly for any  $T > 0$ .

We will show that the total revenue of firm  $i$  at equilibrium is higher than that without service subscription. By Lemma 1,

$$\log \left( \frac{1 + \exp(u_i - p_i) + \exp(u_j - p_j)}{1 + \exp(u_i - p_i - T) + \exp(u_j - p_j)} \right) \geq \frac{T \cdot \exp(u_i - p_i - T)}{1 + \exp(u_i - p_i - T) + \exp(u_j - p_j)}.$$

For the desired inequality

$$\begin{aligned} & \frac{p_i \cdot \exp(u_i - p_i)}{1 + \exp(u_i - p_i) + \exp(u_j - p_j)} + \log \left( \frac{1 + \exp(u_i - p_i) + \exp(u_j - p_j)}{1 + \exp(u_i - p_i - T) + \exp(u_j - p_j)} \right) \\ & \geq \frac{(p_i + T) \cdot \exp(u_i - p_i - T)}{1 + \exp(u_i - p_i - T) + \exp(u_j - p_j - T)}, \end{aligned}$$

it is sufficient to show

$$\begin{aligned} & \frac{p_i}{\exp(-T) + \exp(u_i - p_i - T) + \exp(u_j - p_j - T)} + \frac{T}{1 + \exp(u_i - p_i - T) + \exp(u_j - p_j - T)} \\ & \geq \frac{p_i + T}{1 + \exp(u_i - p_i - T) + \exp(u_j - p_j - T)}, \end{aligned}$$

Or equivalently

$$\begin{aligned} p_i \cdot (1 + \exp(u_i - p_i - T) + \exp(u_j - p_j - T)) & \geq T \cdot \exp(u_i - p_i) \cdot (\exp(-T) + \exp(u_i - p_i - T) \\ & + \exp(u_j - p_j - T)). \end{aligned}$$

The above inequality holds if  $T \leq p_i / \exp(u_i - p_i)$ . Thus, the competition in service subscription results in a “Win-Win-Win” situation for both firms and customers.  $\square$

*Proof of Theorem 7.* For  $S_i > S_i^o(p_i, p_j)$ , customers do not subscribe to the ancillary service. In this case, it is a price competition under the MNL model, i.e., the choice probabilities  $q_i^T(p_i, p_j; S_i)$  and  $q_j^T(p_i, p_j; S_i)$  are

$$q_i^T(p_i, p_j; S_i) := \frac{\exp(u_i - p_i - T)}{1 + \exp(u_i - p_i - T) + \exp(u_j - p_j - T)} \text{ and } q_j^T(p_i, p_j; S_i) := \frac{\exp(u_j - p_j - T)}{1 + \exp(u_i - p_i - T) + \exp(u_j - p_j - T)}.$$

The revenue functions for firms  $i$  and  $j$  are  $R_i^T(p_i, p_j; S_i) = \lambda(p_i + T) \cdot q_i^T(p_i, p_j; S_i)$  and  $R_j^T(p_i, p_j; S_i) = \lambda(p_j + T) \cdot q_j^T(p_i, p_j; S_i)$ . The Nash equilibrium exists and is unique, denoted by  $(p_i^\#, p_j^\#)$ . The detailed analysis and closed-form expression can be found in the proof of Theorem 8.

For  $S_i \leq S_i^o(p_i, p_j)$ , customers subscribe to the ancillary service with firm  $i$ . Then, a customer will choose the main product of firm  $i$  with probability  $q_i^S(p_i, p_j; S_i)$ ,

$$q_i^S(p_i, p_j; S_i) := \frac{\exp(u_i - p_i)}{1 + \exp(u_i - p_i) + \exp(u_j - p_j - T)} \text{ and } q_j^S(p_i, p_j; S_i) := \frac{\exp(u_j - p_j - T)}{1 + \exp(u_i - p_i) + \exp(u_j - p_j - T)}.$$

The revenue functions are  $R_i^S(p_i, p_j; S_i) = \lambda p_i \cdot q_i^S(p_i, p_j; S_i) + S_i$  and  $R_j^S(p_i, p_j; S_i) = \lambda(p_j + T) \cdot q_j^S(p_i, p_j; S_i)$ . Comparing the two cases,  $p_i$  in Case 2 plays exactly the same role of  $(p_i + T)$  in Case 1, so the unique Nash equilibrium is  $(p_i^\# + T, p_j^\#)$ .

(a) If customers do not subscribe to the ancillary service,  $(p_i^\#, p_j^\#)$  is the unique Nash equilibrium. While firm  $j$  has no incentive to deviate, firm  $i$  may lower price such that customers will subscribe to its ancillary service. If so, he must set his price  $p_i$  such that the willingness to pay for the service subscription is greater than or equal to  $S_i$ , i.e.,  $S_i^o(p_i, p_j^\#) \geq S_i$ .

Similar to the proof of Corollary 2,  $S_i^o(p_i, p_j^\#) + R_i^S(p_i, p_j^\#)$  is unimodal in  $p_i$  and is increasing in  $p_i$  for  $p_i \leq p_i^\#$ . Denote the unique solution to the following equation w.r.t.  $p_i \leq p_i^\#$  by  $\bar{p}_i$ :

$$S_i^o(p_i, p_j^\#) + R_i^S(p_i, p_j^\#) = R_i^T(p_i^\#, p_j^\#).$$

Let  $\bar{S}_i = S_i^o(\bar{p}_i, p_j^\#)$ . Therefore, if  $S_i > \bar{S}_i$ , firm  $i$  has no incentive to deviate either and then  $(p_i^\#, p_j^\#)$  is indeed the unique equilibrium.

(b) If  $S_i$  is low enough, customers subscribe to the ancillary service with firm  $i$ . Then, the unique Nash equilibrium in the price competition is  $(p_i^\sharp + T, p_j^\sharp)$ , because  $S_i$  is the sunk cost and  $p_i$  plays exactly the same role of  $p_i + T$  in the case without subscription. By Proposition 2,  $S_i^o(p_i^\sharp + T, p_j)$  is increasing in  $p_j$ . While firm  $i$  has no incentive to deviate, firm  $j$  may lower its price such that customers will not subscribe to the ancillary service with firm  $i$ . If so, its price  $p_j$  must satisfy  $S_i^o(p_i^\sharp + T, p_j) < S_i$ . Denote the unique solution to the following equation w.r.t.  $p_j \leq p_j^\sharp$  by  $\underline{p}_j$ :

$$R_j^T(p_i^\sharp + T, p_j) = R_j^S(p_i^\sharp + T, p_j^\sharp).$$

Let  $\underline{S}_i = S_i^o(p_i^\sharp + T, \underline{p}_j)$ . Therefore, if  $S_i < \underline{S}_i$ , firm  $j$  has no incentive to deviate either, so  $(p_i^\sharp + T, p_j^\sharp)$  is the unique Nash equilibrium.

Apparently, we have  $\bar{S}_i > \underline{S}_i$  by Proposition 2. Each firm captures exactly the same amount of market share, so firm  $j$  earns the same amount of revenue. Firm  $i$  collects more revenue by exactly the amount of  $S_i$ , because customers subscribe to its ancillary service. Whereas, customer surplus decreases also by the exact same amount.

(c) For  $\underline{S}_i \leq S_i \leq \bar{S}_i$ , there are two candidates for the pure-strategy Nash equilibrium, i.e.,  $(p_i^\sharp, p_j^\sharp)$  and  $(p_i^\sharp + T, p_j^\sharp)$ . However, by similar arguments, we find that either firm  $i$  or  $j$  has incentive to deviate from  $(p_i^\sharp, p_j^\sharp)$  or  $(p_i^\sharp + T, p_j^\sharp)$ , e.g., firm  $i$  may lower its price such that customers will subscribe to its ancillary service if customers have not yet; firm  $j$  may also lower its price such that customers will unsubscribe to firm  $i$  if they have already. Thus, there does not exist a pure-strategy Nash equilibrium.  $\square$

*Proof of Theorem 8.* As shown in Theorem 6, for any pair of prices  $(p_i, p_j)$ , each firm will price its service subscription such that all customers will subscribe to it. Therefore, the two-dimensional problem reduces to a single-dimension price competition. The payoff function for firm  $i$  is

$$R_i^S(p_i, p_j) = \frac{\lambda p_i \cdot \exp(u_i - p_i)}{1 + \exp(u_i - p_i) + \exp(u_j - p_j - T)} + \lambda \log \left( \frac{1 + \exp(u_i - p_i) + \exp(u_j - p_j - T)}{1 + \exp(u_i - p_i - T) + \exp(u_j - p_j - T)} \right). \quad (\text{EC.2})$$

By similar arguments to Corollary 2, given any price  $p_j$ , function  $R_i^S(p_i, p_j)$  is strictly unimodal w.r.t.  $p_i$ , which is equivalent to the quasi-concavity in a single-dimension space. Therefore, there exists a Nash equilibrium (see, e.g., Vives 2001). Next, we will establish its uniqueness and find the closed-form expression. Without loss of generality, let  $\lambda = 1$  for notational simplicity in this proof.

Define the corresponding attractiveness as follows:  $a_i^T = \exp(u_i - p_i - T)$ ,  $a_i^S = \exp(u_i - p_i)$  and  $a_j^T = \exp(u_j - p_j - T)$ . We change decision variables to the attractiveness. First, we consider the case without a service subscription option. The revenue functions for firms  $i$  and  $j$  are

$$R_i^T(a_i^T, a_j^T) = \frac{(u_i - \log(a_i^T)) \cdot a_i^T}{1 + a_i^T + a_j^T} \quad \text{and} \quad R_j^T(a_i^T, a_j^T) = \frac{(u_j - \log(a_j^T)) \cdot a_j^T}{1 + a_i^T + a_j^T}.$$

The first-order condition of  $R_i^T(a_i^T, a_j^T)$  w.r.t.  $a_i^T$  is

$$\frac{\partial R_i^T(a_i^T, a_j^T)}{\partial a_i^T} = -\frac{1}{1 + a_i^T + a_j^T} + \frac{(1 + a_j^T)(u_i - \log(a_i^T))}{(1 + a_i^T + a_j^T)^2} = 0.$$

Using some algebra yields

$$(a - a_i^T) \cdot (u_i - \log(a_i^T)) = a, \quad (\text{EC.3})$$

where  $a = 1 + a_i^T + a_j^T$  represents the total attractiveness of the outside option, products  $i$  and  $j$ . For any given  $a$  in a feasible region, the left-hand side (LHS) of equation (EC.3) is decreasing in  $a_i^T$ , so the corresponding  $a_i^T$  is unique, denoted by  $a_i^T = A_i^T(a)$ . To study the monotonicity of  $A_i^T(a)$  with respect to  $a$ , taking the full differential for equation (EC.3) and rearranging it results in

$$\frac{\partial A_i^T(a)}{\partial a} = \frac{(u_i - \log(a_i^T)) - 1}{(u_i - \log(a_i^T)) + (a - a_i^T)/a_i^T} > 0.$$

The inequality holds because  $u_i - \log(a_i^T) > 1$  for any  $a$  in the implicit function (EC.3). We will next show that  $A_i^T(a)/a$  is decreasing in  $a$ . Equation (EC.3) can be rewritten as follows

$$(1 - A_i^T(a)/a) \cdot (u_i - \log(A_i^T(a))) = 1.$$

Note that  $A_i^T(a)$  is increasing in  $a$ , so  $A_i^T(a)/a$  must be decreasing in  $a$ .

Similarly, we can define  $A_j^T(a)$  for the one-to-one mapping between  $a$  and  $a_j^T$ . Moreover,  $A_j^T(a)/a$  is also decreasing in  $a$ . Consider the following equation w.r.t.  $a$ :

$$\frac{1}{a} + \frac{A_i^T(a)}{a} + \frac{A_j^T(a)}{a} = 1. \quad (\text{EC.4})$$

The LHS is strictly decreasing in  $a$ , so there exists a unique solution to the above equation, denoted by  $a^\sharp$ . Therefore, there exists a unique Nash equilibrium  $(a_i^\sharp, a_j^\sharp)$  in the attractiveness competition without service subscription, where  $a_i^\sharp = A_i^T(a^\sharp)$  and  $a_j^\sharp = A_j^T(a^\sharp)$ . Immediately, the unique Nash equilibrium in price competition is  $(p_i^\sharp, p_j^\sharp)$ , where  $p_i^\sharp = u_i - T - \log(a_i^\sharp)$  and  $p_j^\sharp = u_j - T - \log(a_j^\sharp)$ .

If only firm  $i$  offers service subscription, its revenue can be rewritten as follows

$$R_i^S(a_i^S, a_j^S) = \frac{(u_i - \log(a_i^S)) \cdot a_i^S}{1 + a_i^S + a_j^T} + \log\left(\frac{1 + a_i^S + a_j^T}{1 + a_i^S/\exp(T) + a_j^T}\right),$$

while firm  $j$ 's revenue function does not change. By the first-order condition, we obtain

$$(a - a_i^S) \cdot (u_i - \log(a_i^S)) \cdot (a - (1 - 1/\exp(T))a_i^S) = a^2/\exp(T), \quad (\text{EC.5})$$

where again  $a = 1 + a_i^S + a_j^T$ . Apparently, for given  $a$  and  $T$  there also exists a unique corresponding  $a_i^S$ , denoted by  $A_i^S(a; T)$ . For given  $T$ , taking the full differential for equation (EC.5) and using some algebra yields

$$\begin{aligned} \frac{\partial A_i^S(a; T)}{\partial a} &= \left( (u_i - \log(a_i^S)) \cdot (a - (1 - 1/\exp(T))a_i^S) + (a - a_i^S) \cdot (u_i - \log(a_i^S)) - 2a/\exp(T) \right) \\ &\quad / \left( (u_i - \log(a_i^S)) \cdot (a - (1 - 1/\exp(T))a_i^S) + (a - a_i^S)/a_i^S \cdot (a - (1 - 1/\exp(T))a_i^S) \right. \\ &\quad \left. + (a - a_i^S) \cdot (u_i - \log(a_i^S)) \cdot (1 - 1/\exp(T)) \right). \end{aligned}$$

By equation (EC.5), and  $a - a_i^S < a$ ,  $a - (1 - 1/\exp(T))a_i^S < a$ , we have  $(u_i - \log(a_i^S)) \cdot (a - (1 - 1/\exp(T))a_i^S) > a/\exp(T)$  and  $(a - a_i^S) \cdot (u_i - \log(a_i^S)) > a/\exp(T)$ . Then, for any given  $T$ ,  $\partial A_i^S(a; T)/\partial a > 0$  and therefore  $A_i^S(a; T)$  is strictly increasing in  $a$ .

Equation (EC.5) can also be rewritten as follows

$$(1 - A_i^S(a; T)/a) \cdot (u_i - \log(A_i^S(a; T))) \cdot (\exp(T) - (\exp(T) - 1) \cdot A_i^S(a; T)/a) = 1.$$

Note that  $A_i^S(a; T)$  is increasing in  $a$ , so  $(u_i - \log(A_i^S(a; T)))$  is decreasing in  $a$ . Therefore, by the above equation,  $A_i^S(a; T)/a$  must be decreasing in  $a$ . The unique Nash equilibrium is the solution to the following equation:

$$\frac{1}{a} + \frac{A_i^S(a; T)}{a} + \frac{A_j^T(a)}{a} = 1. \quad (\text{EC.6})$$

The LHS of the above equation is strictly decreasing in  $a$ , so there exists a unique solution, denoted by  $a^b$ . Therefore, for any given  $T$ , there exists a unique Nash equilibrium  $(a_i^b, a_j^b)$ , where  $a_i^b = A_i^S(a^b; T)$  and  $a_j^b = A_j^T(a^b)$ .

Next, we study the comparative statics of the equilibrium w.r.t.  $T$ . Equation (EC.5) can also be reexpressed as follow:

$$(a - a_i^S) \cdot (u_i - \log(a_i^S)) \cdot (\exp(T) - (\exp(T) - 1) \cdot a_i^S/a) = a. \quad (\text{EC.7})$$

Note that  $\exp(T) - (\exp(T) - 1) \cdot a_i^S/a = (1 - a_i^S/a)\exp(T) + a_i^S/a \geq 1$  for any  $T \geq 0$ , and it is increasing in  $T$  for any given  $a$ . Therefore, for each given  $a$ , the corresponding  $A_i^S(a; T)$  by equation (EC.7) is increasing in  $T$ . The unique solution to equation (EC.6), denoted by  $a^b(T)$ , is increasing in  $T$ . Therefore, the equilibrium  $a_j^b = A_j^T(a^b)$  is increasing in  $T$  and  $a_i^b = A_i^S(a^b; T)$  is also increasing in  $T$ . Immediately, the equilibrium prices, expressed by  $p_i^b = u_i - \log(a_i^b)$  and  $p_j^b = u_j - T - \log(a_j^b)$ , are decreasing in  $T$ .

In addition,  $A_i^S(a; T) \geq A_i^T(a)$  for any  $a$ . By comparing equations (EC.4) and (EC.6), we have  $a^b \geq a^\#$  and therefore  $(a_i^b, a_j^b) \succeq (a_i^\#, a_j^\#)$ . Furthermore, for the corresponding prices,  $p_i^b < p_i^\# + T$  and  $p_j^b < p_j^\#$  for any given pay-per-use fee  $T$ .

Moreover, we have

$$\frac{A_i^S(a^b)}{a^b} > \frac{A_i^T(a^\#)}{a^\#}, \quad \frac{A_j^T(a^b)}{a^b} < \frac{A_j^T(a^\#)}{a^\#} \quad \text{and} \quad \frac{A_i^S(a^b)}{a^b} + \frac{A_j^T(a^b)}{a^b} > \frac{A_i^T(a^\#)}{a^\#} + \frac{A_j^T(a^\#)}{a^\#}.$$

That is, firm  $i$  will capture more customers, firm  $j$  will lose some market share, and the total market share served by both firms will increase. Recall that firm  $j$ 's attractiveness is higher, i.e.,  $a_j^b > a_j^\#$ , so the corresponding price is lower and therefore firm  $j$ 's revenue at the equilibrium is lower, compared to that without service subscription for firm  $i$ .  $\square$

*Proof of Theorem 9.* Continue with the proof of Theorem 8. Similarly, the revenue function of firm  $j$  with service subscription can be rewritten as follows:

$$R_j^S(a_i^S, a_j^S) = \frac{(u_j - \log(a_j^S)) \cdot a_j^S}{1 + a_i^S + a_j^S} + \log\left(\frac{1 + a_i^S + a_j^S}{1 + a_i^S + a_j^S / \exp(T)}\right).$$

By the first-order condition, we obtain the following equation:

$$(a - a_j^S) \cdot (u_j - \log(a_j^S)) \cdot (a - (1 - 1/\exp(T))a_j^S) = a^2 / \exp(T), \quad (\text{EC.8})$$

where again  $a = 1 + a_i^S + a_j^S$ . Similarly, we can define the corresponding  $A_j^S(a; T)$  for each  $a$  and  $T$ , and  $A_j^S(a; T)$  is increasing in  $a$  and  $T$ , respectively. Moreover,  $A_j^S(a; T)/a$  is decreasing in  $a$ . The unique Nash equilibrium is the solution to the following equation:

$$\frac{1}{a} + \frac{A_i^S(a; T)}{a} + \frac{A_j^S(a; T)}{a} = 1. \quad (\text{EC.9})$$

The LHS of the above equation is decreasing in  $a$ , so for each given  $T$ , there exists a unique solution, denoted by  $a^\natural(T)$ . Therefore, there exists a unique Nash equilibrium  $(a_i^\natural, a_j^\natural)$ , where  $a_i^\natural = A_i^S(a^\natural; T)$  and  $a_j^\natural = A_j^S(a^\natural; T)$ . The unique Nash equilibrium in price competition is  $(p_i^\natural, p_j^\natural)$ , where  $p_i^\natural = u_i - \log(a_i^\natural)$  and  $p_j^\natural = u_j - \log(a_j^\natural)$ . By similar arguments,  $a^\natural(T)$  is increasing in  $T$ , and therefore  $a_i^\natural$  and  $a_j^\natural$  are also increasing in  $T$ , respectively. Therefore,  $p_i^\natural$  and  $p_j^\natural$  are decreasing in  $T$ .

Next, we compare the equilibria with and without service subscription. Equation (EC.8) can also be rewritten as follow:

$$(a - a_i^S) \cdot (u_i - \log(a_i^S)) \cdot (\exp(T) - (\exp(T) - 1) \cdot a_i^S / a) = a. \quad (\text{EC.10})$$

Note that  $\exp(T) - (\exp(T) - 1) \cdot a_i^S / a = (1 - a_i^S / a) \exp(T) + a_i^S / a \geq 1$  for any  $T \geq 0$ , where the inequality holds because  $(1 - a_i^S / a) \exp(T)$  is increasing in  $T$ . Comparing equations (EC.3) to (EC.10), for each  $a$ , the corresponding  $a_i^S \geq a_i^T$ , i.e.,  $A_i^S(a; T) \geq A_i^T(a)$  and  $A_j^S(a; T) \geq A_j^T(a)$  for each  $a$ . Thus, comparing equations (EC.4) and (EC.9) yields  $a^\natural \geq a^\sharp$ . Therefore,  $(a_i^\natural, a_j^\natural) \succeq (a_i^\sharp, a_j^\sharp)$ . Immediately, we have  $(p_i^\natural, p_j^\natural) \preceq (p_i^\sharp, p_j^\sharp) + T$ .  $\square$
